# Supplementary material for: External Validation with Accuracy Confounders of VCO2-Derived Predicted Energy Expenditure Compared to Resting Energy Expenditure Measured by Indirect Calorimetry in Mechanically Ventilated Children
Source: MDPI journal article supplement (doi:10.3390/nu14194211), 2022-10-10
Supplement: s1 [file s1]

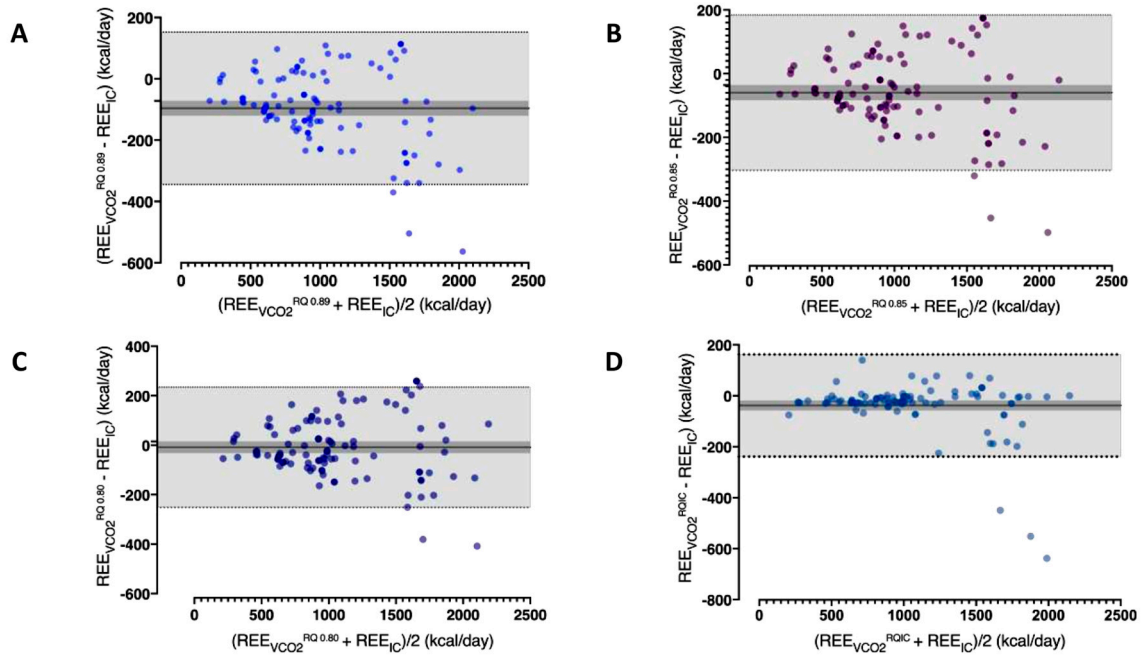

Figure S1: Bland–Altman plots whereby resting energy expenditure (REE) based on volumetric carbon dioxide production (VCO<sub>2</sub>) measurements (REE<sub>VCO<sub>2</sub></sub>) using different RQ values are compared to REE measured by indirect calorimetry (IC) (REE<sub>IC</sub>) at ICU Day-1. Solid lines indicate the bias (kcal/day), and the light shades with the fine dotted lines indicate the limits of agreement (bias  $\pm$  (1.96  $\times$  SD) = precision). Dark shades represent the 95% confidence intervals of the mean (bias). (A) REE<sub>VCO<sub>2</sub></sub><sup>RQ 0.89</sup>, assuming RQ of 0.89 compared to REE<sub>IC</sub>. (B) REE<sub>VCO<sub>2</sub></sub><sup>RQ 0.85</sup>, assuming RQ of 0.85 compared to REE<sub>IC</sub>. (C) REE<sub>VCO<sub>2</sub></sub><sup>RQ 0.80</sup>, assuming RQ of 0.80 compared to REE<sub>IC</sub>. (D) REE<sub>VCO<sub>2</sub></sub><sup>RQ IC</sup> using individual RQ values calculated by IC compared to REE<sub>IC</sub>.
